# Supplementary material for: Loss of p53 and SMAD4 induces adenosquamous subtype pancreatic cancer in the absence of an oncogenic KRAS mutation
Source: PubMed Central journal article supplement — Cell Rep Med. 2024 Sep 3;5(9):101711. doi: 10.1016/j.xcrm.2024.101711 (PMC11525027; doi:10.1016/j.xcrm.2024.101711), 2024-09-03
Supplement: mmc1.pdf [file mmc1.pdf]

**Cell Reports Medicine, Volume 5**

**Supplemental information**

**Loss of p53 and SMAD4 induces adenosquamous  
subtype pancreatic cancer in the absence  
of an oncogenic KRAS mutation**

**Daowei Yang, Xinlei Sun, Rohan Moniruzzaman, Hua Wang, Citu Citu, Zhongming Zhao, Ignacio I. Wistuba, Huamin Wang, Anirban Maitra, and Yang Chen**

# Figure S1

**A**

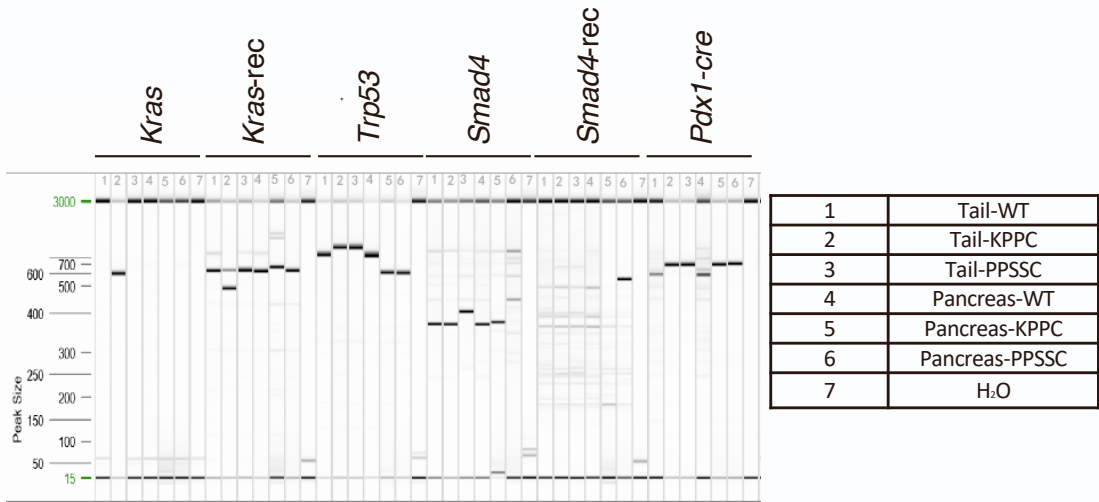

**B**

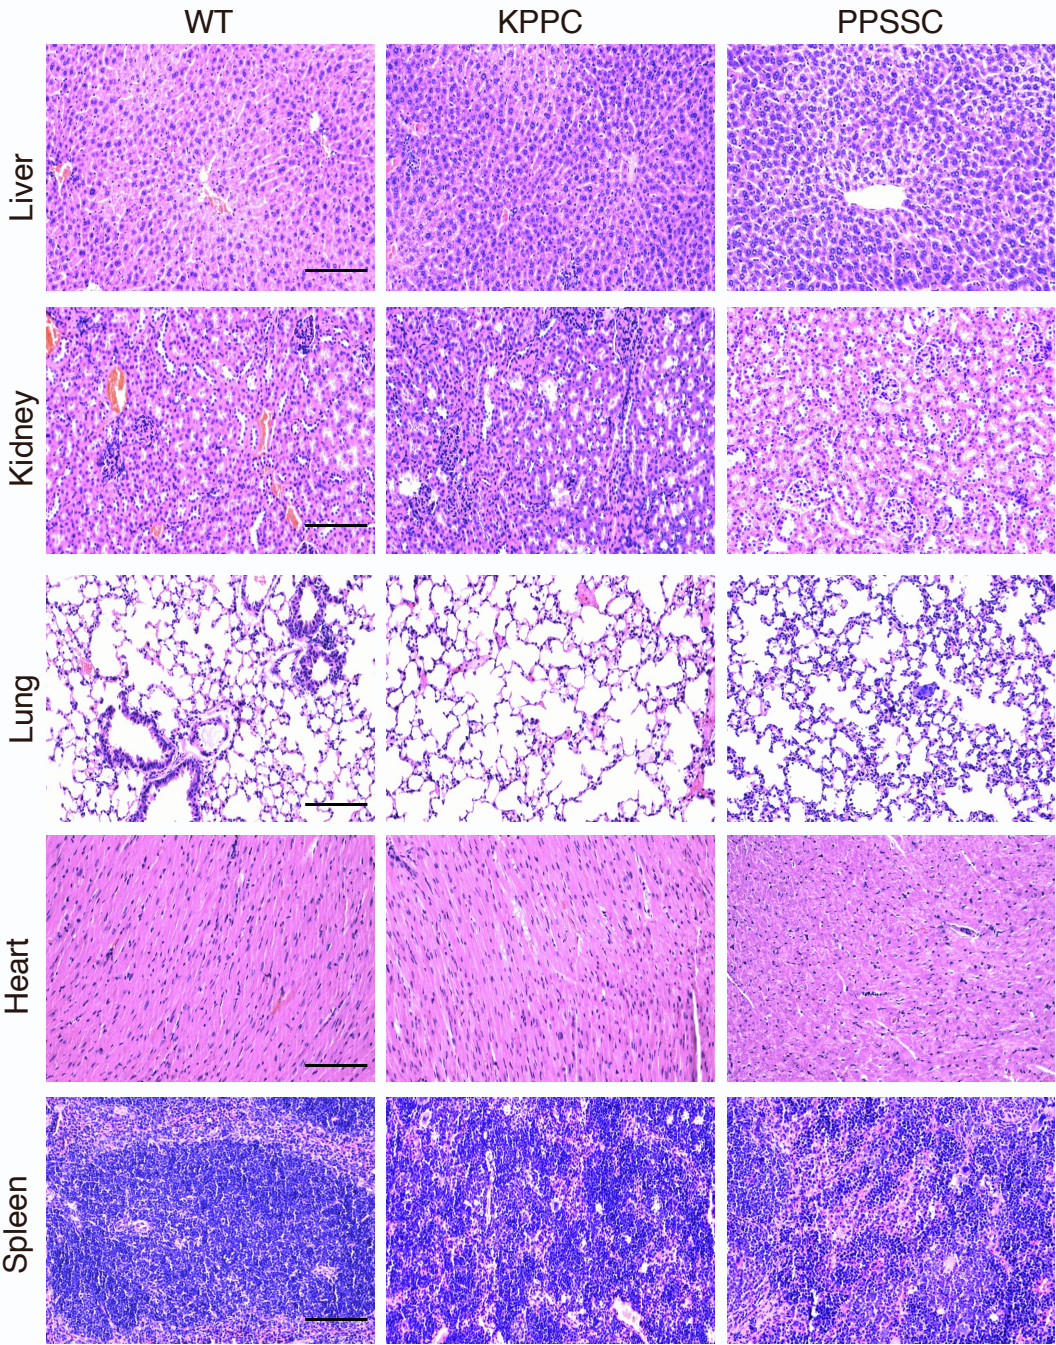

**Figure S1. Characterization of the genotype and tissue histology for KPPC and PPSSC mice. Related to Figure 1.**

(A) PCR product detection confirming the *Pdx1-Cre* specific deletion of *Smad4* and *Trp53*, as well as the presence of *LSL-Kras<sup>G12D</sup>* and *Pdx1-Cre* in DNA samples from indicated mice. *Kras* recombination (*Kras-rec*) primers, *Smad4* recombination (*Smad4-rec*) primers, and *Trp53* flox primers were used to validate the *Pdx1-Cre*-mediated recombination of *LSL-Kras<sup>G12D</sup>*, *Smad4<sup>loxP/loxP</sup>*, and *Trp53<sup>loxP/loxP</sup>* alleles, respectively.

(B) Comparison of the histology by H&E staining on a variety of tissues from KPPC mice (2.5-month-old) and PPSSC mice (8-month-old), as compared with tissues from normal (WT) mice (2.5-month-old). Scale bar: 100  $\mu$ m.

**Figure S2**

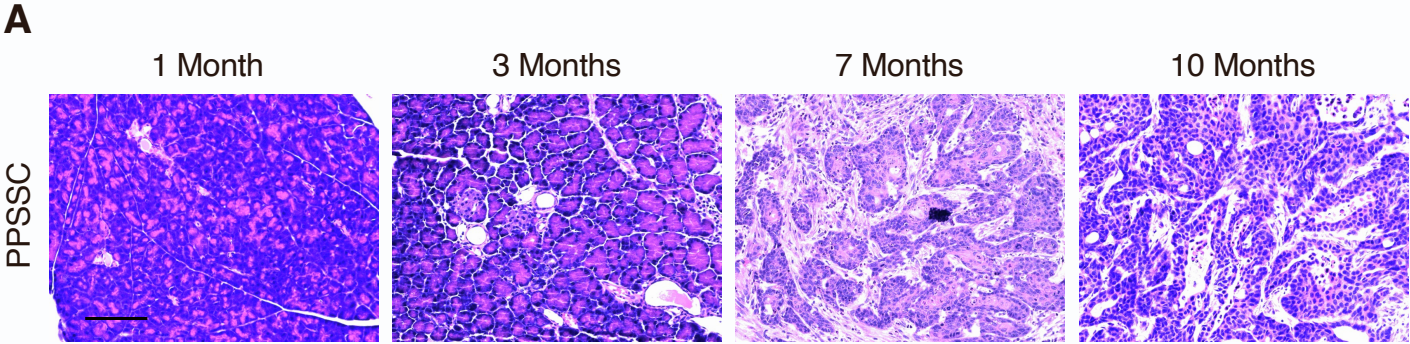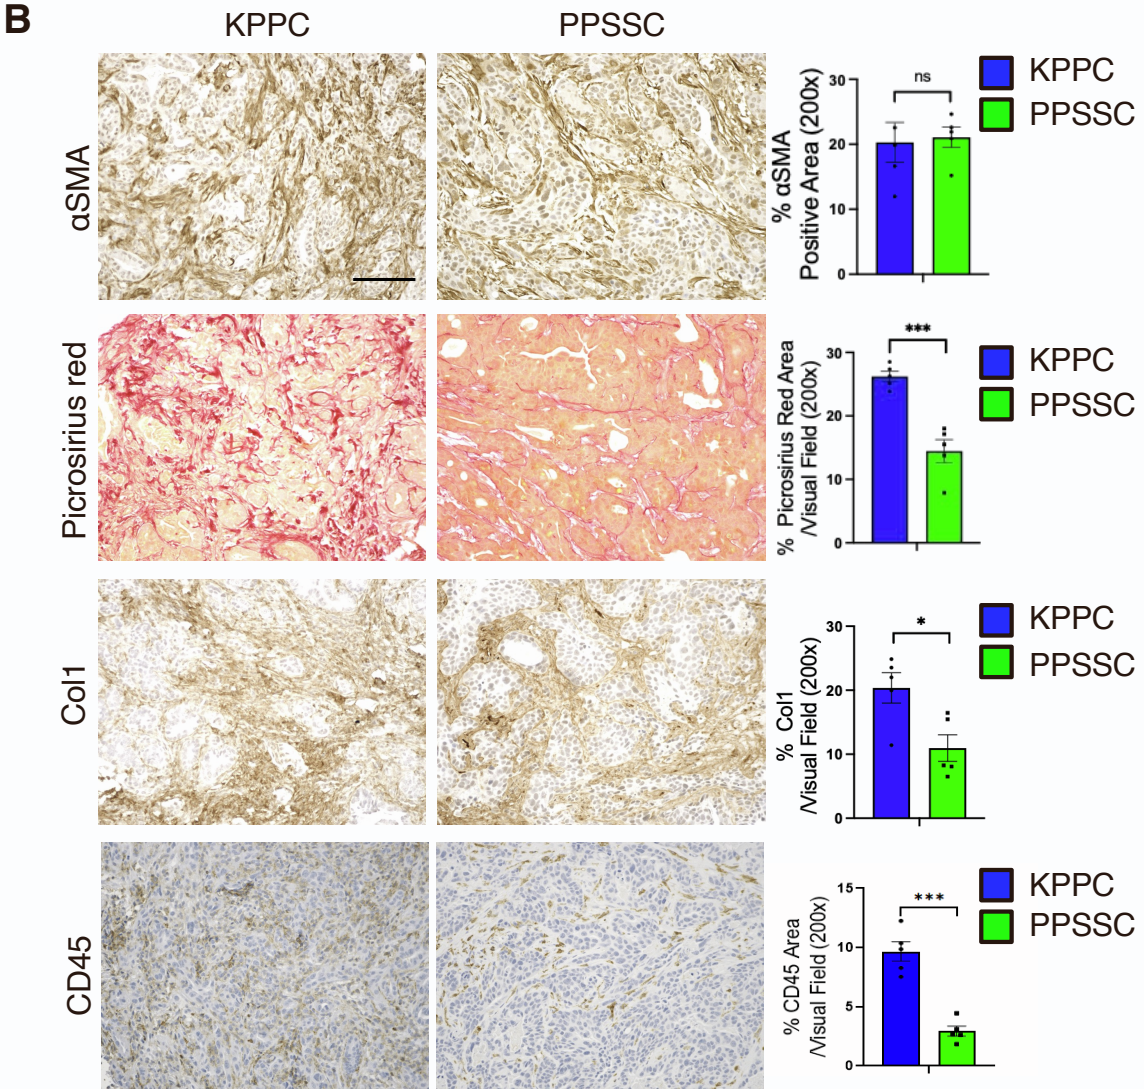

**Figure S2. Additional characterization of the tumor histology for PPSSC and KPPC tumors. Related to Figure 1.**

(A) Pancreatic tissue histology of PPSSC mice at various ages from 1 month to 10 months. Scale bar: 100  $\mu\text{m}$ .

(B) Representative images of immunohistochemistry staining for alpha-smooth muscle actin ( $\alpha\text{SMA}$ ), type I collagen (Coll), and CD45 on pancreatic tumor sections from KPPC mice (2.5-month-old) and stage-matched PPSSC mice (8-month-old). Picrosirius red staining was used for collagen fibers visualization. Quantitative results were shown with Student's *t* test. Scale bar: 100  $\mu\text{m}$ . \*  $P < 0.05$ , \*\*\*  $P < 0.001$ . ns: not significant.

**Figure S3**

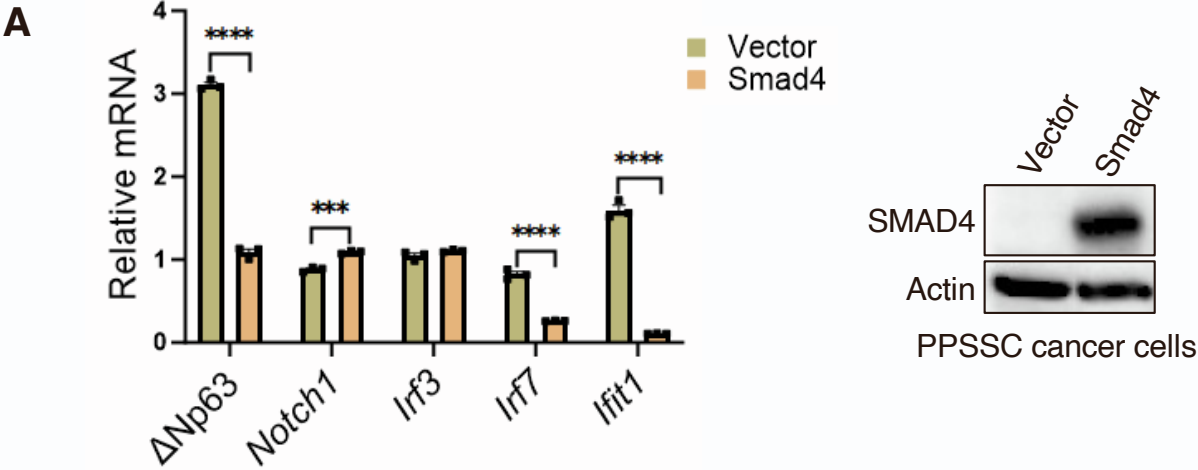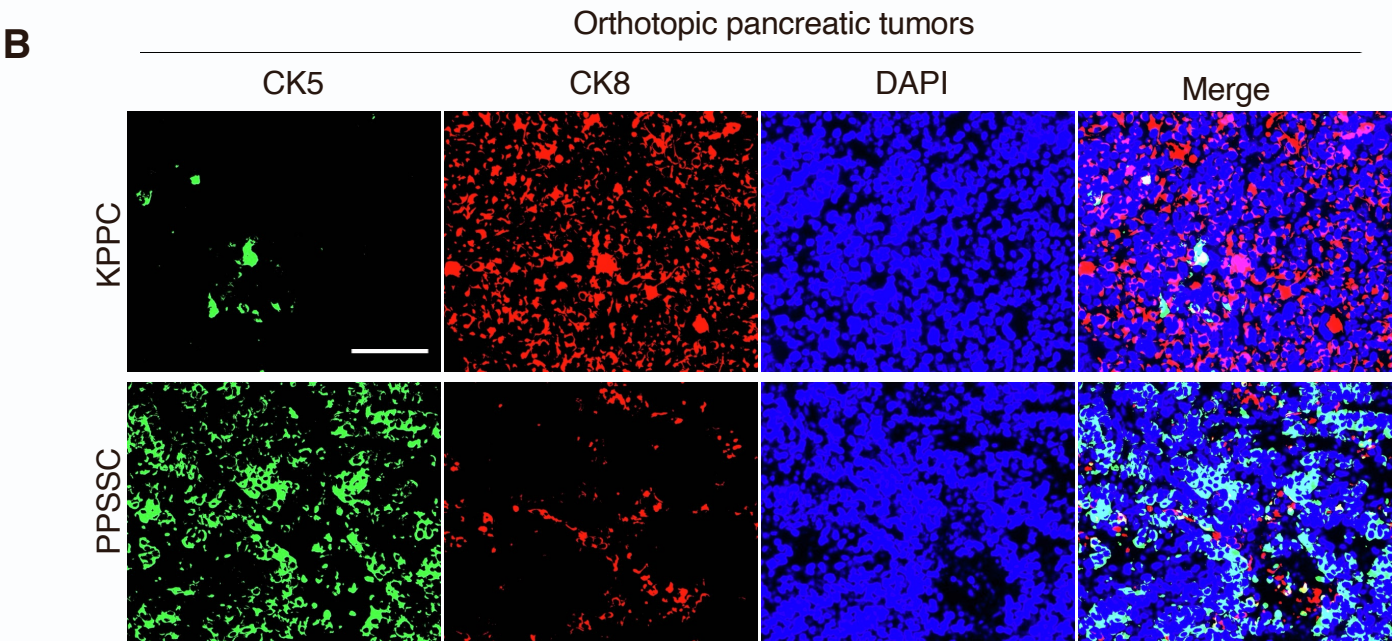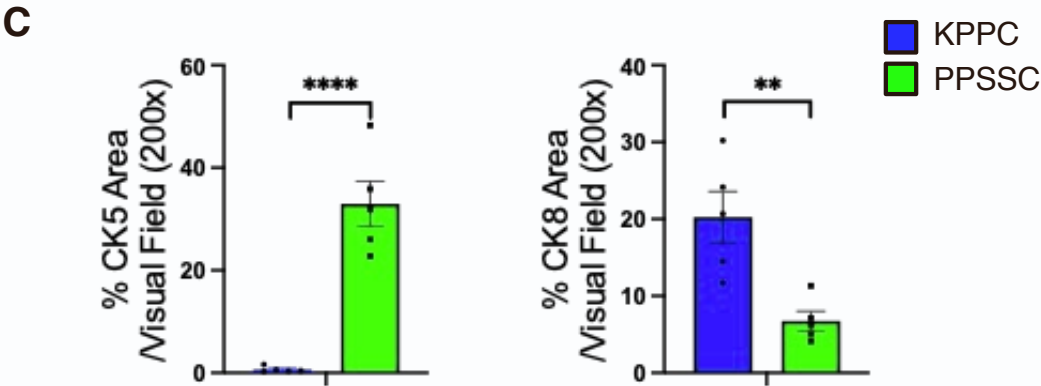

**Figure S3. Expression profile of cytokeratin (CK) markers in orthotopic pancreatic tumors formed by KPPC and PPSSC cancer cell lines. Related to Figure 3.**

(A) qRT-PCR analysis of  $\Delta Np63$ , *Notch1*, *Irf3*, *Irf7*, and *Ifit1* expression levels in PPSSC cancer cells transfected with either a vector of SMAD4 expression or a control vector (n = 3 biological replicates). Western blot assay validated the SMAD4 expression in PPSSC cancer cells transfected with SMAD4-expressing vector. Gene expression levels were compared with Student's *t* test. \*\*\*  $P < 0.001$ , \*\*\*\*  $P < 0.0001$ .

(B) Representative images of immunofluorescence staining for CK5 (green), CK8 (red), and nuclei/DAPI (blue) in orthotopic pancreatic tumors (n = 5 per group) formed by KPPC and PPSSC cancer cell lines. Scale bar: 100  $\mu\text{m}$ .

(C) Quantitative analysis of CK5 and CK8 positive staining shown in (B). Results were shown with Student's *t* test. \*\*  $P < 0.01$ , \*\*\*\*  $P < 0.0001$ .

**Figure S4**

**A**

Epithelial mesenchymal transition

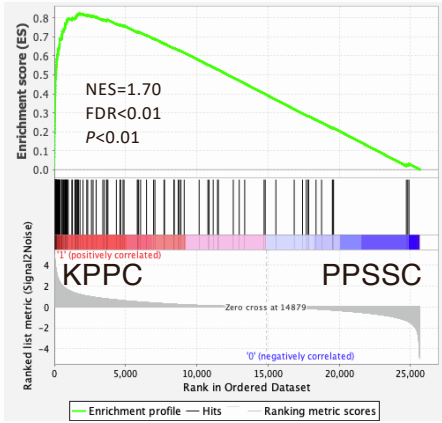

**B**

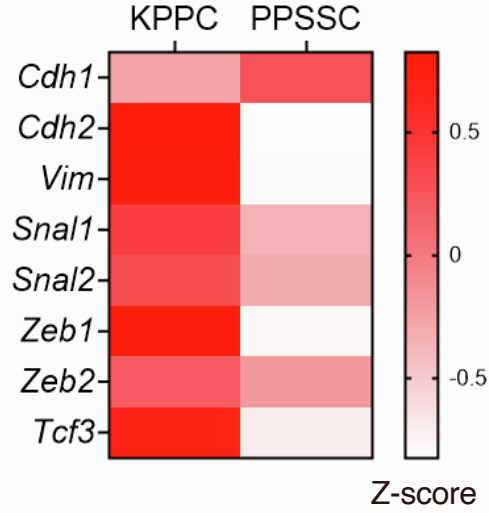

**C**

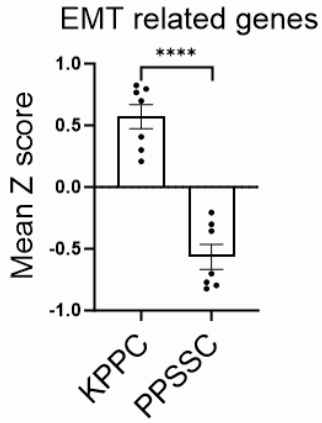

**D**

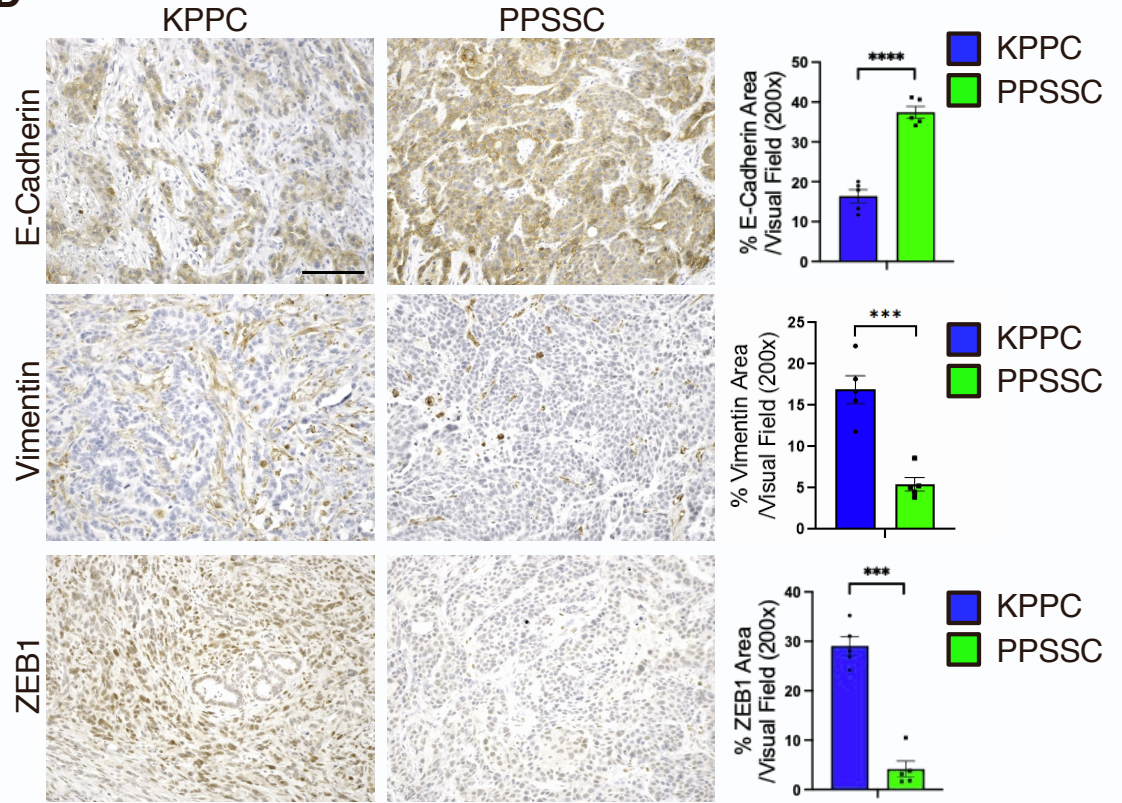

**E**

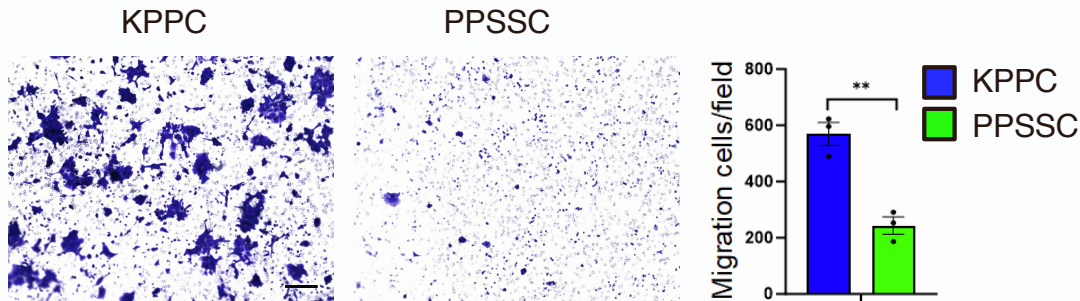



**Figure S4. Characterization of epithelial-to-mesenchymal transition (EMT) phenotype in KPPC and PPSSC cancer cell lines. Related to Figure 3.**

(A) Gene Set Enrichment Analysis (GSEA) of RNA-seq data on KPPC and PPSSC cancer cell lines. EMT-associated genes were downregulated in PPSSC cancer cells, as compared with KPPC cancer cells.

(B and C) Heatmap showing the gene expression levels of EMT-related genes between KPPC and PPSSC cancer cell lines (B). The mean Z-score of these genes was compared with Student's *t* test (C). \*\*\*\*  $P < 0.0001$ .

(D) Representative images of immunohistochemistry staining for E-Cadherin, Vimentin, and ZEB1 on pancreatic tumor sections from KPPC mice (2.5-month-old) and stage-matched PPSSC mice (8-month-old). Quantitative results were also shown with Student's *t* test. Scale bar: 100  $\mu\text{m}$ . \*\*\*  $P < 0.001$ , \*\*\*\*  $P < 0.0001$ .

(E) Representative images of transwell migration assay on KPPC and PPSSC cancer cell lines ( $n = 3$  biological replicates). The migrated cells attached to the bottom layer of transwell membrane were counted. Results were shown with Student's *t* test. \*\*  $P < 0.01$ .

Figure S5

A

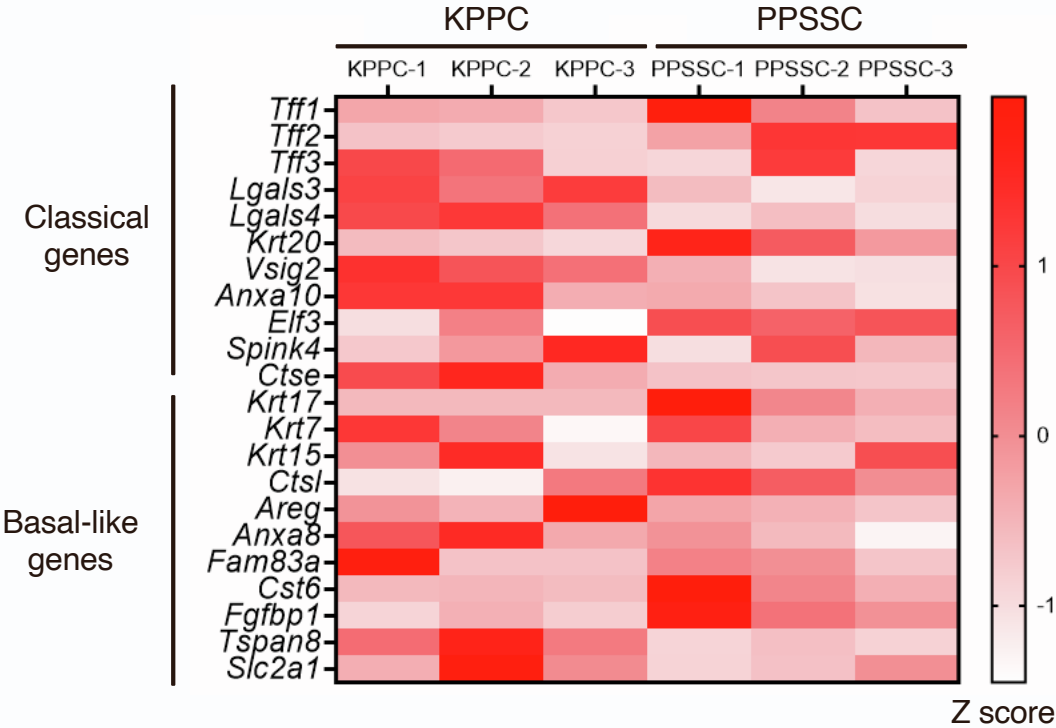

B

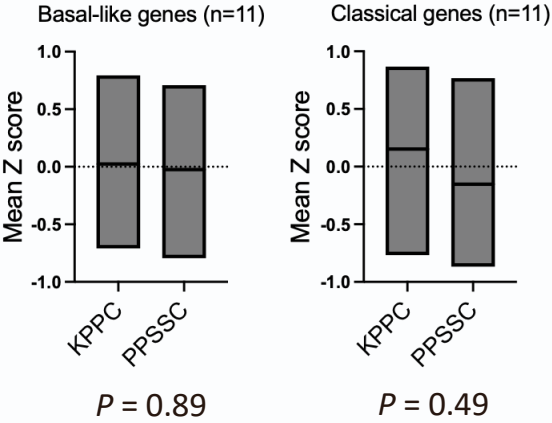

**Figure S5. The expression levels of basal-like and classical subtype genes in KPPC and PPSSC cancer cells.**

**Related to Figure 3.**

(A) Heatmap showing the expression profiles of basal-like and classical subtype genes in KPPC and PPSSC cancer cells.

(B) Box plots comparing the mean Z-scores of basal-like and classical subtype genes shown in A.

# Figure S6

**A**

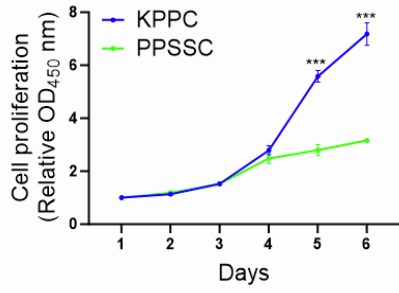

**B**

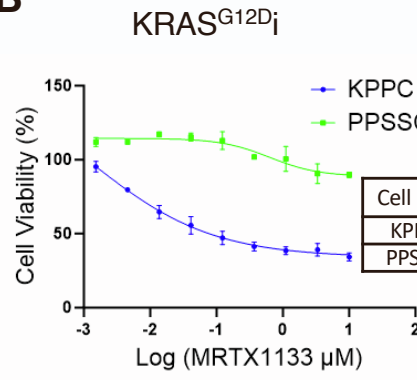

**C**

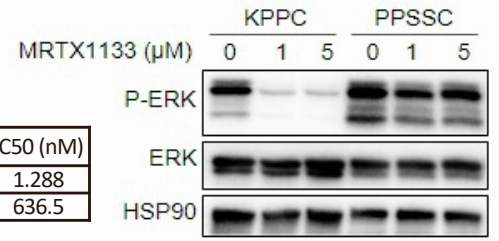

**D**

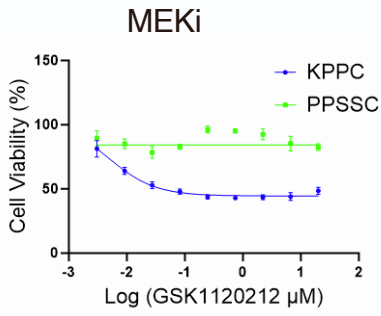

**E**

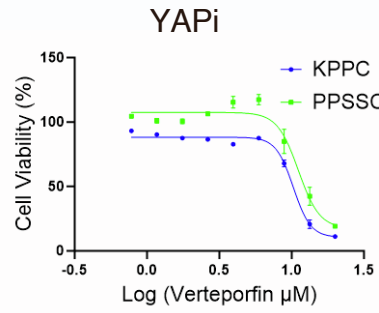

**F**

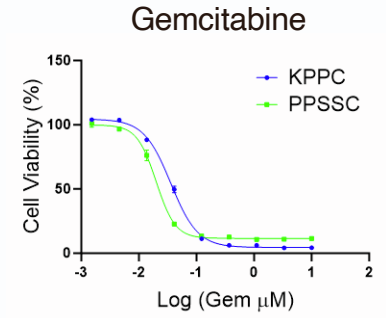

**G**

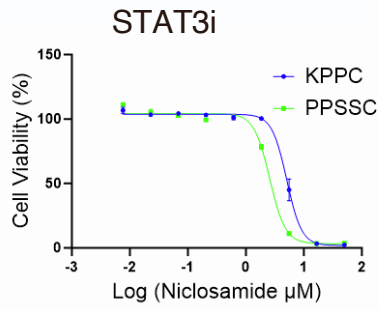

**H**

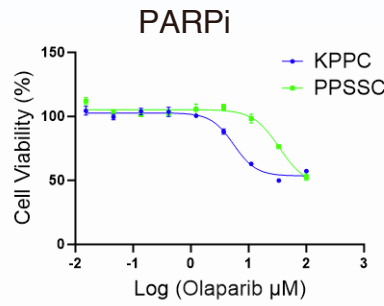

**I**

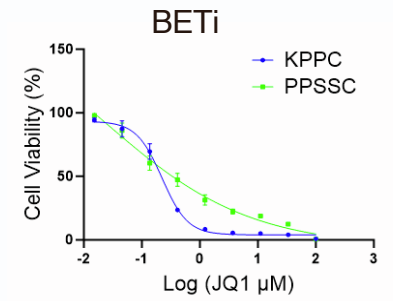

**J**

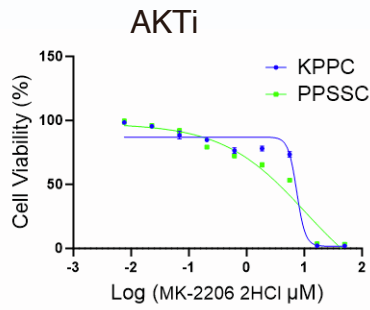

**K**

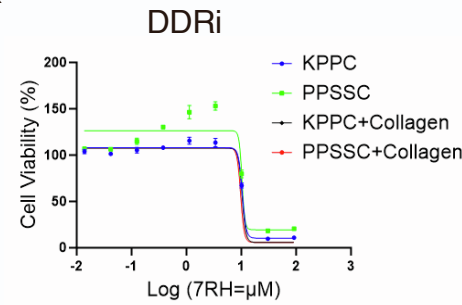

**L**

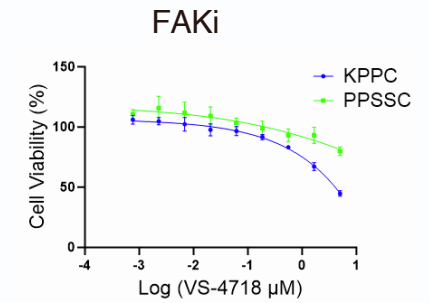

**M**

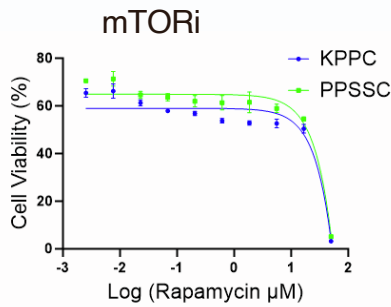

**N**

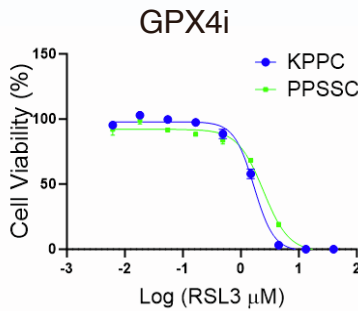

**O**

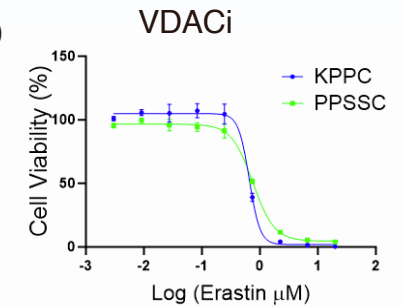

**Figure S6. Characterization of primary cancer cell lines from KPPC and PPSSC tumors. Related to Figure 3.**

**(A)** Cell proliferation of KPPC and PPSSC cancer cell lines over time (n = 3 biological replicates). One-way ANOVA with Tukey's multiple comparison test was used to compare these two groups. \*\*\*  $P < 0.001$ .

**(B)** Cell viability of KPPC and PPSSC cancer cell lines (% normalized to the untreated group of each cell line) treated with MRTX1133 (n = 3 biological replicates). IC50 values of MRTX1133 in PPSSC and KPPC cancer cells were also shown.

**(C)** Detection of phospho-ERK (P-ERK) and total ERK in KPPC and PPSSC cancer cell lines treated with MRTX1133 at indicated concentrations for three hours by Western blot assay.

**(D-O)** Cell viability of KPPC and PPSSC cancer cell lines (% normalized to untreated group of each cell line) treated with MEK inhibitor GSK1120212 (**D**), YAP inhibitor Verteporfin (**E**), Gemcitabine (Gem) (**F**), STAT3 inhibitor Niclosamide (**G**), PARP inhibitor Olaparib (**H**), BET inhibitor JQ1 (**I**), AKT inhibitor MK-2206 (**J**), DDR1 inhibitor 7RH (with or without type I collagen coating) (**K**), FAK inhibitor VS-4718 (**L**), mTOR inhibitor Rapamycin (**M**), GPX4 inhibitor RSL3 (**N**), and VDAC inhibitor Erastin (**O**) (n = 3 biological replicates).

**Figure S7**

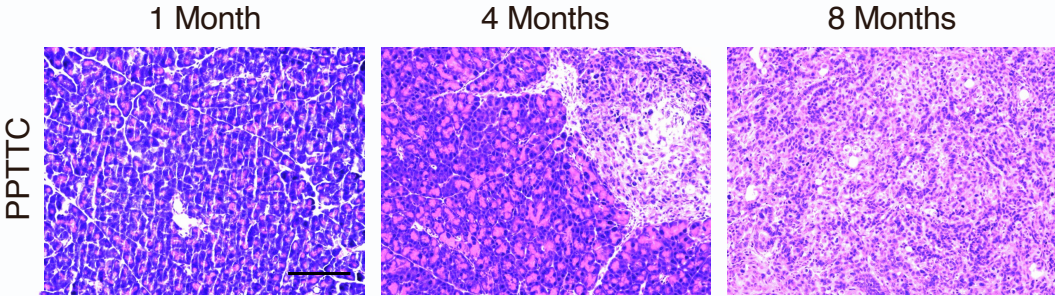

**Figure S7. Pancreatic tissue histology of PPTTC mice at various ages. Related to Figure 4.**

Comparison of pancreatic tissue histology by H&E staining of PPTTC mice at various ages from 1 month to 8 months. Scale bar: 100  $\mu$ m.

Figure S8

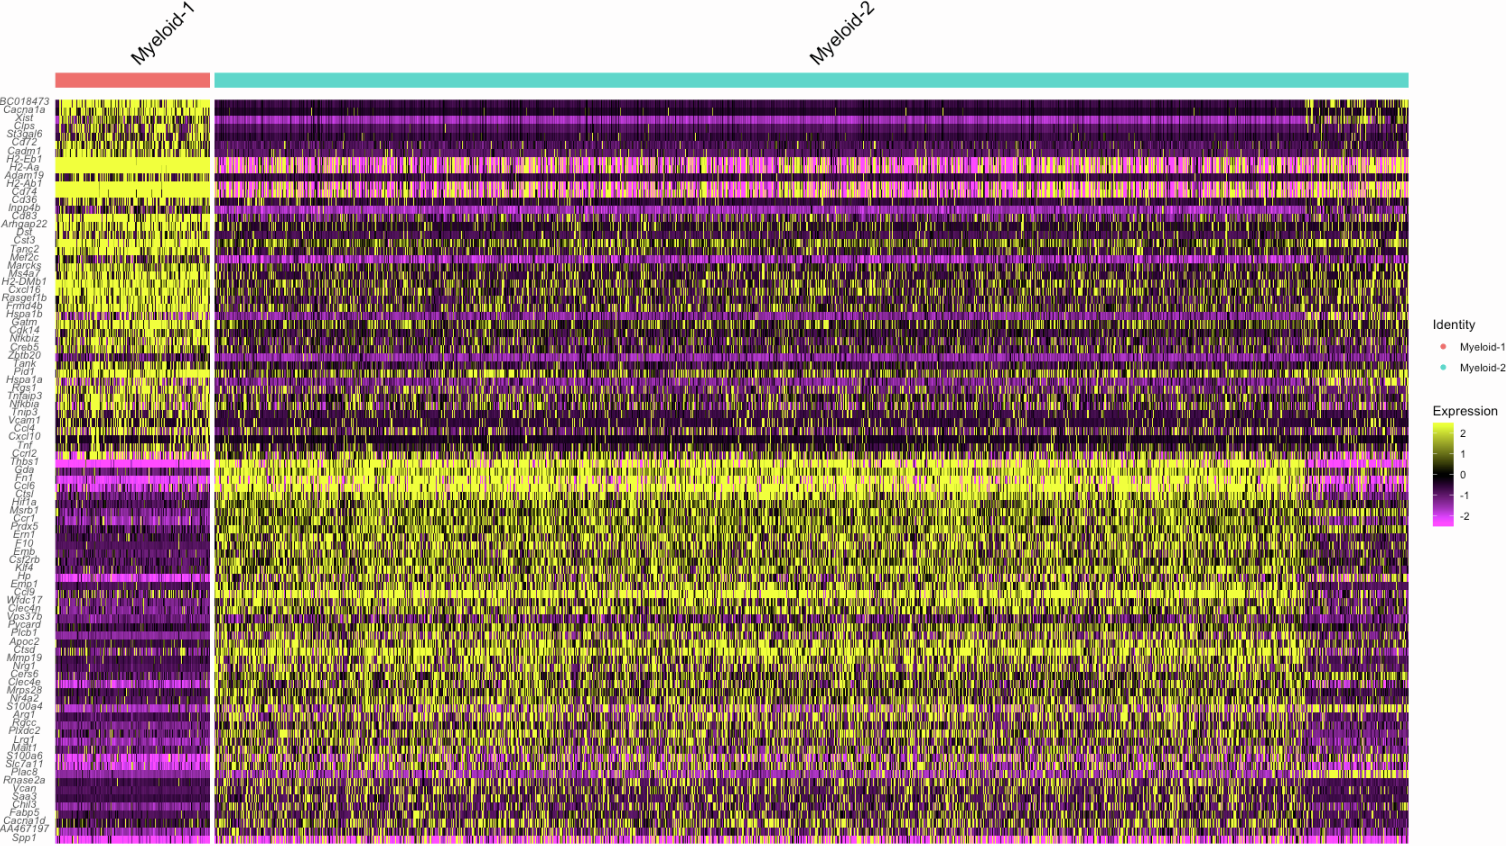



**Figure S8. Single-cell analysis showing the expression profiles of signature genes of Myeloid-1 and Myeloid-2 cell subclusters. Related to Figure 5.**

Expression profiles of signature genes shown in heatmap for Myeloid-1 and Myeloid-2 in KPPC and PPSSC tumors.

**Figure S9**

PPSSC

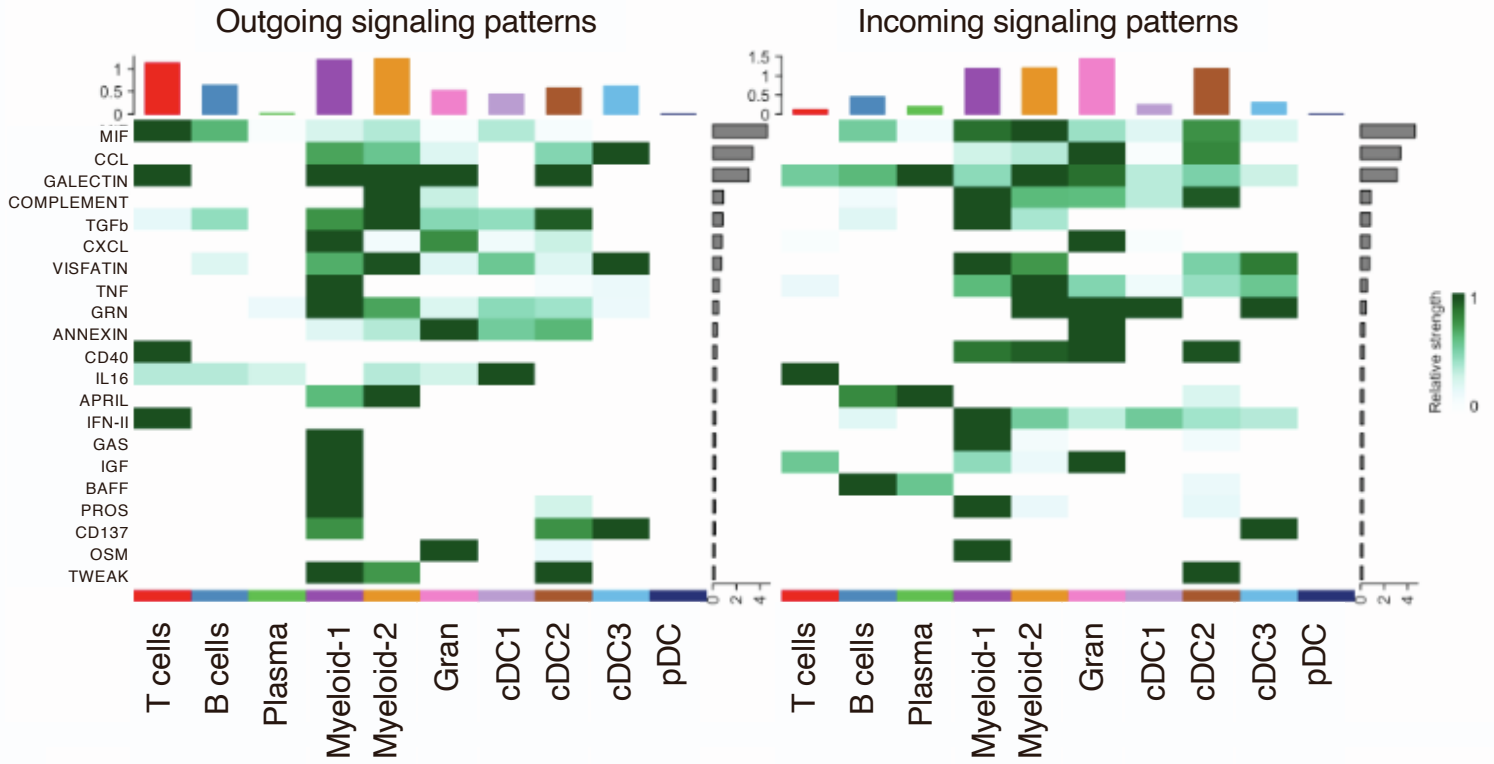

KPPC

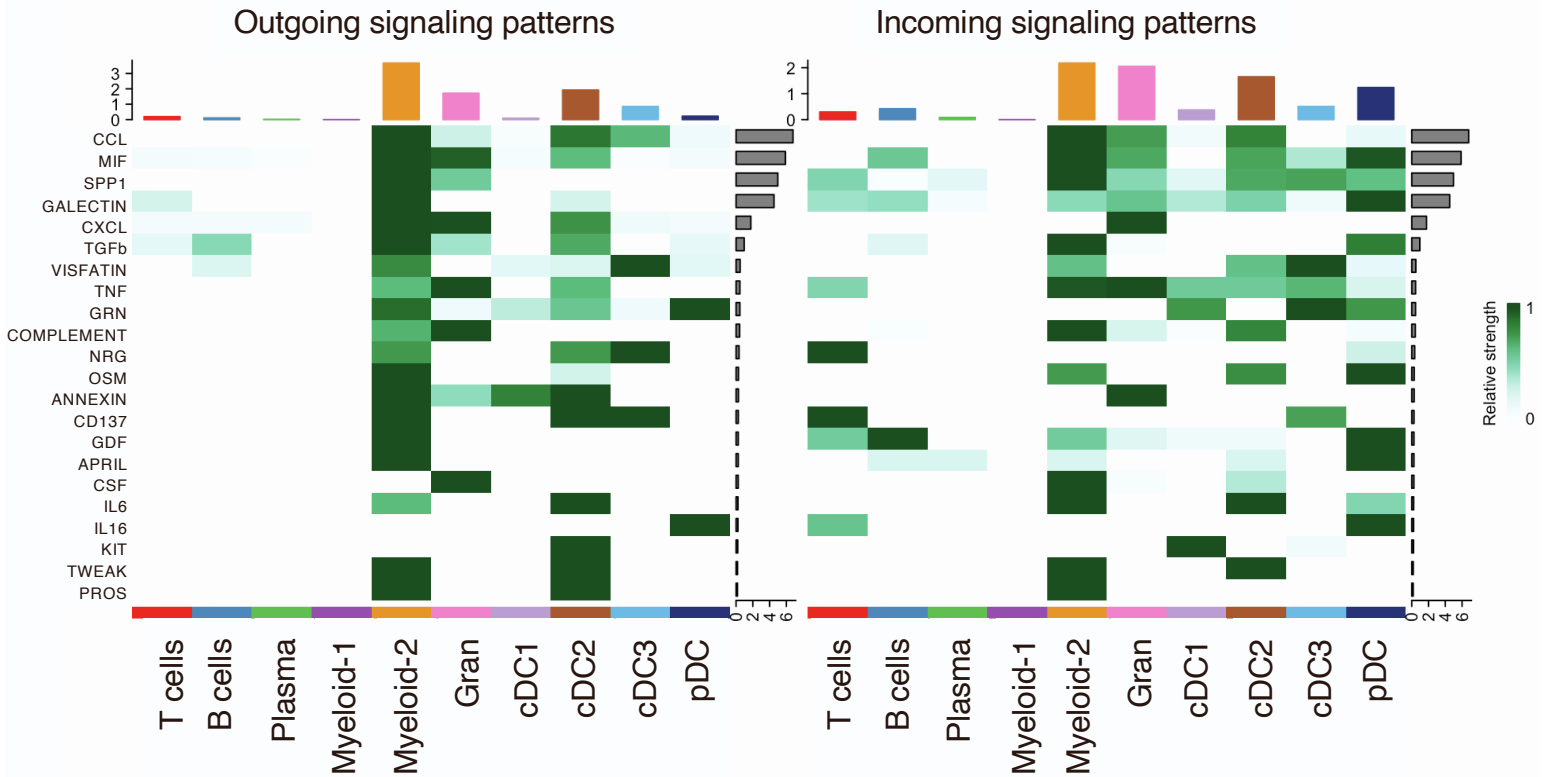

**Figure S9. The signaling pathways of cell-cell communication networks across various immune cells in KPPC and PPSSC tumors. Related to Figure 5.**

The cell-cell communication intensity of indicated signaling pathways across various immune cell populations in PPSSC and KPPC tumors. The outgoing signaling and incoming signaling patterns were separately shown in the heatmap.

# Figure S10

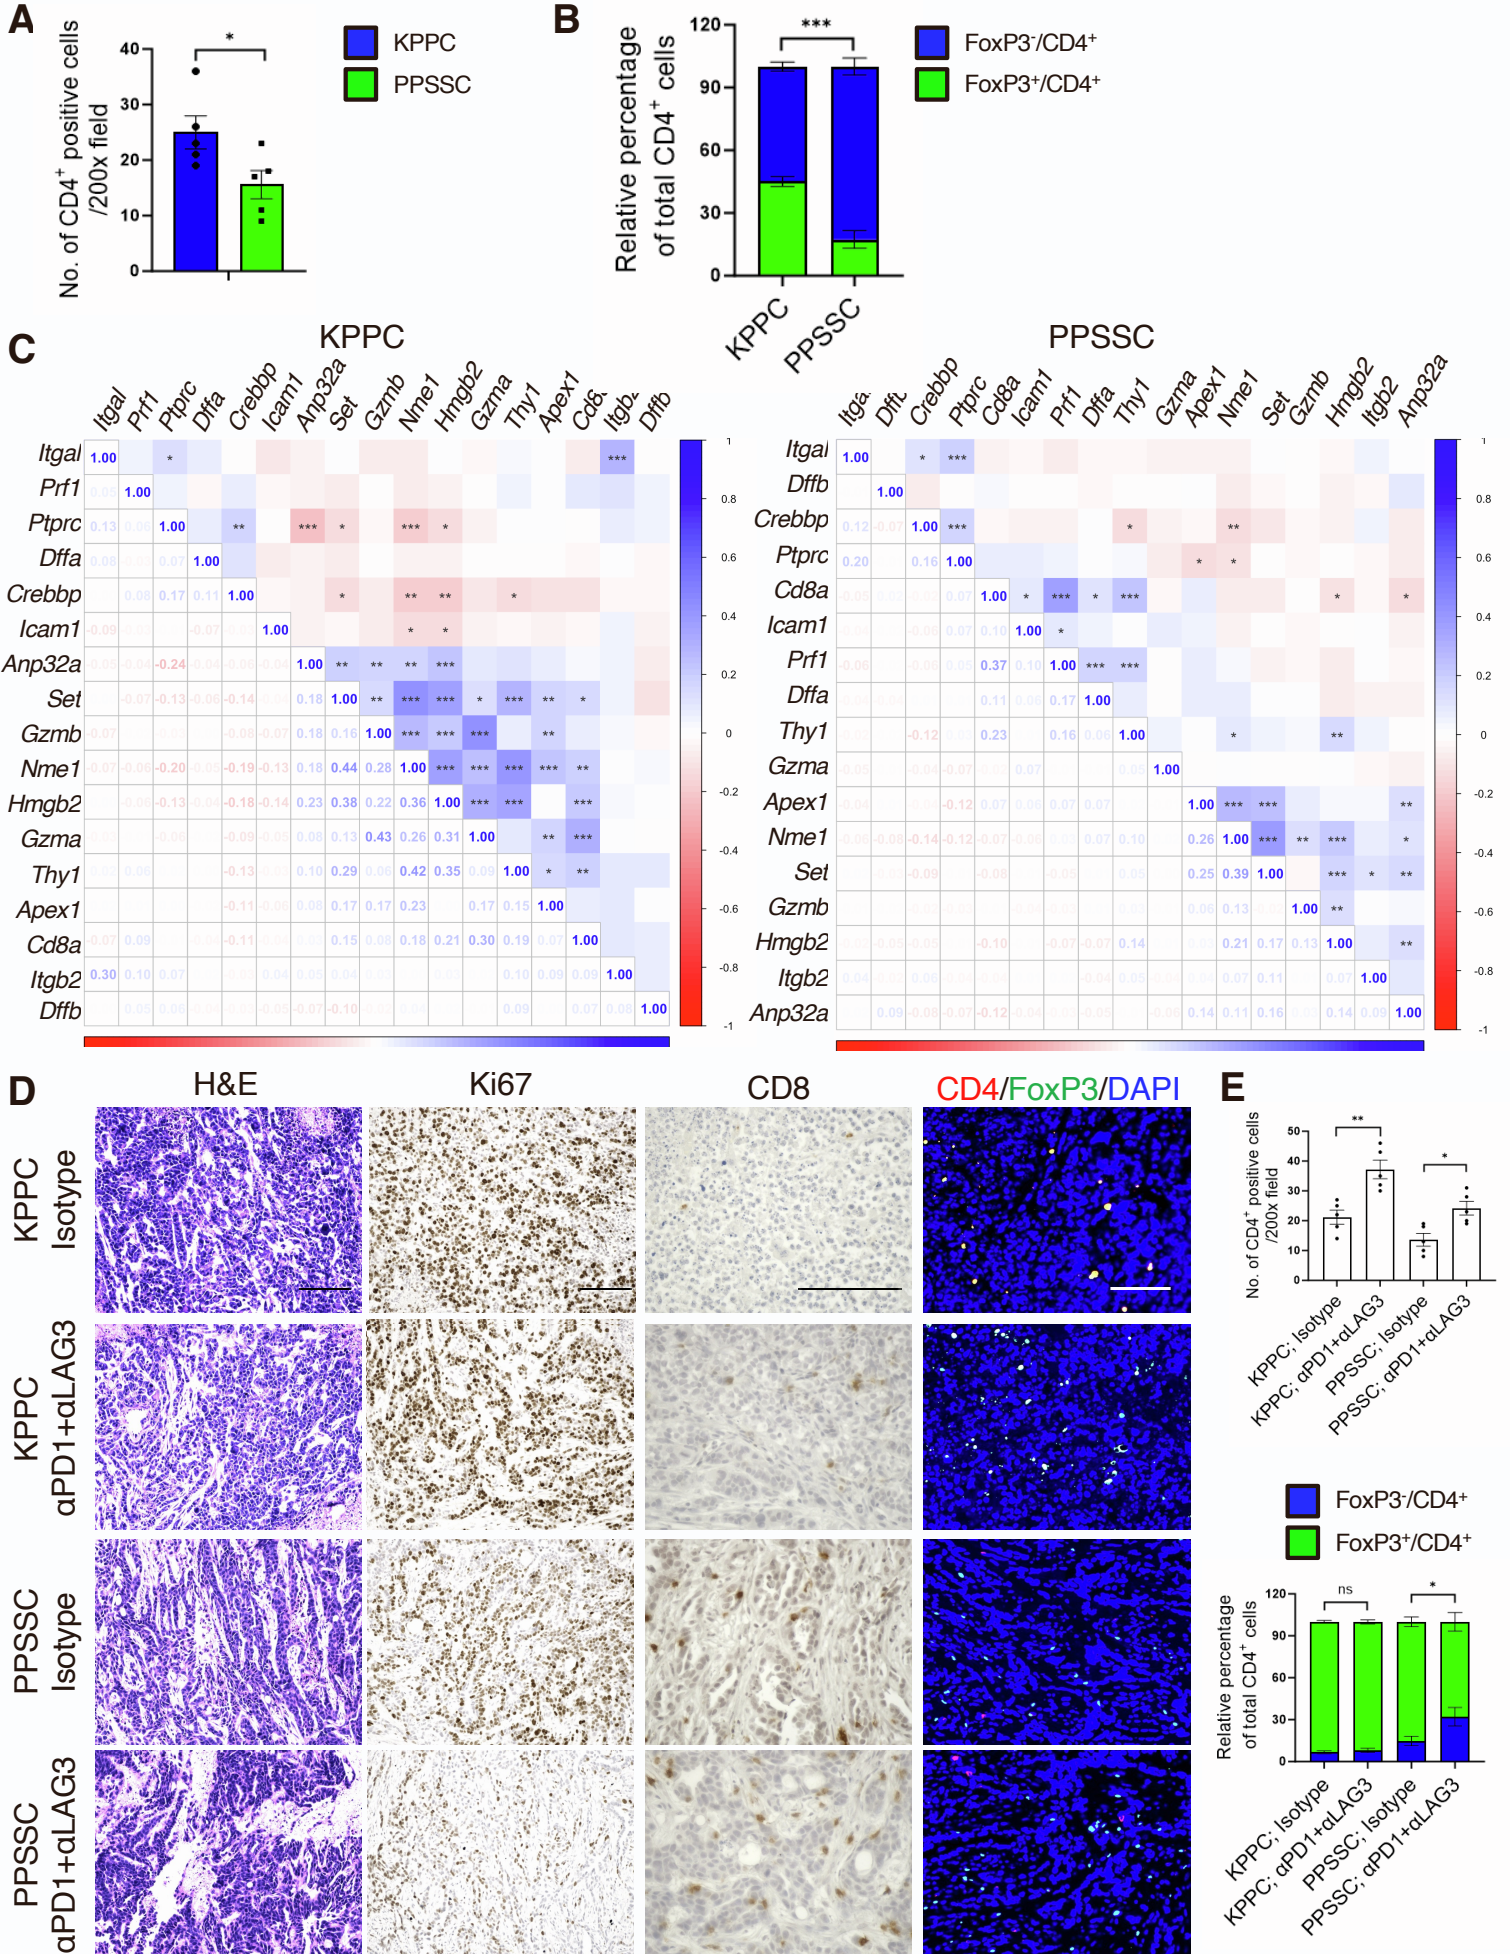

**Figure S10. Characterization of T cells in KPPC and PPSSC tumors. Related to Figure 7.**

**(A and B)** Quantitative analysis of immunofluorescence staining images described in **Figure 7F**. The numbers of total CD4<sup>+</sup> T cells (**A**), FoxP3<sup>+</sup>/CD4<sup>+</sup> T cells (**B**), and FoxP3<sup>-</sup>/CD4<sup>+</sup> T cells (**B**) were quantified respectively. Results were shown with Student's *t* test. \*  $P < 0.05$ , \*\*\*  $P < 0.001$ .

**(C)** The correlation analysis of *Cd8a* and cytotoxic T cell-related genes in CD8<sup>+</sup> T cells. Correlation strength was shown in the heatmap.

**(D and E)** Representative images of H&E staining, Ki67 staining, CD8 staining, and CD4/FoxP3/DAPI immunofluorescence staining on orthotopic pancreatic tumors with indicated treatments. The numbers of total CD4<sup>+</sup> T cells, FoxP3<sup>+</sup>/CD4<sup>+</sup> T cells, and FoxP3<sup>-</sup>/CD4<sup>+</sup> T cells were quantified respectively and were shown in **E**. Scale bar: 100  $\mu\text{m}$ . \*  $P < 0.05$ , \*\*  $P < 0.01$ .
